# Supplementary material for: Osmolyte regulation by TonEBP/NFAT5 during anoxia-recovery and dehydration–rehydration stresses in the freeze-tolerant wood frog (Rana sylvatica)
Source: PeerJ. 2017 Jan 19;5:e2797. doi: 10.7717/peerj.2797 (PMC5251939; doi:10.7717/peerj.2797)
Supplement: Supplemental Information 1 — Mean band densitometries (±S.E.M., n = 4 independent protein isolations from different animals) were calculated from representative bands that were standardized to the Coomassie total protein loading control lanes for each blot. The Data was then normalized to the mean of the control values, and these normalized values are shown above for each of the 4 targets at each of the 3 condtions in each of the 3 tissues, and were plotted and shown on histograms for Figs. 1–6 1-6. This data consists of either an n = 4 or n = 3 for each time point for each target because occasionally a sample needed to be removed from analysis because the protein was degraded or it was a clear outlier. Data (n = 3 or n = 4) were analyzed using a one-way analysis of variance with a post hoc Tukey’s test (p < 0.05); for each parameter measured, values that are not statistically different from each other share the same letter notation on the Figs. 1–6. [file peerj-05-2797-s001.xlsx]

## Sheet: Sheet1
NFAT5 Anoxia-Recovery Muscle (Fig.1)				BGT-1 Anoxia-Recovery Muscle (Fig.1)
	Control	Anoxia	Recovery		Control	Anoxia	Recovery
	0.917011	1.55482	1.0728		1.18024	1.44599	0.859891
	1.19799	1.75095	1.14975		1.25325	1.84905	1.34686
	0.885003	1.86256	1.1369		0.715885	2.41806	1.23193
					0.850625	1.88607	1.4753
SMIT Anoxia-Recovery Muscle (Fig.1)				Aldose Reductase Anoxia-Recovery Muscle (Fig.1)
	Control	Anoxia	Recovery		Control	Anoxia	Recovery
	0.473621	1.09531	1.92009		1.25363	0.832056	0.511258
	1.07568	1.26893	2.1601		0.872782	0.621957	0.33821
	1.12437	1.12701	1.94424		0.954257	0.664238	0.555797
	1.32632	1.58655	2.12766		0.91933	0.396497	0.685045
NFAT5 Anoxia-Recovery Liver (Fig.2)				BGT-1 Anoxia-Recovery Liver (Fig.2)
	Control	Anoxia	Recovery		Control	Anoxia	Recovery
	1.07206	0.416692	0.617458		0.998843	0.963204	1.06387
	0.903517	0.446652	0.558065		0.586968	1.07305	1.36822
	1.09433	0.665581	0.887187		1.31107	0.94646	1.49656
	0.930093	0.814619	0.596349		1.10312	1.64415	1.06828
SMIT Anoxia-Recovery Liver (Fig.2)				Aldose Reductase Anoxia-Recovery Liver (Fig.2)
	Control	Anoxia	Recovery		Control	Anoxia	Recovery
	0.912773	0.970625	0.919688		0.830251	1.25994	0.263572
	0.782377	1.22379	1.46044		0.857622	1.26038	0.80559
	1.04036	0.938485	0.404525		1.08213	1.26304	0.754081
	1.26448	1.73009	0.823286		1.23		0.460577
NFAT5 Anoxia-Recovery Kidney (Fig.3)				BGT-1 Anoxia-Recovery Kidney (Fig.3)
	Control	Anoxia	Recovery		Control	Anoxia	Recovery
	1.04688	0.448664	0.599898		0.836049	2.03787	1.13563
	0.805293	0.650764	0.393988		1.41542	2.2434	1.31035
	0.820529	0.558337	0.844082		0.824901	1.2881	1.54405
	1.3273	0.576725	0.571512		0.923635	2.90417	1.04027
SMIT Anoxia-Recovery Kidney (Fig.3)				Aldose Reductase Anoxia-Recovery Kidney (Fig.3)
	Control	Anoxia	Recovery		Control	Anoxia	Recovery
	0.766738	0.687624	1.00217		0.875167	0.697768	0.47362
	1.11321	0.826726	1.00627		1.29012	0.546979	0.634736
	0.972915	0.972475	1.04243		0.882004	0.849042	0.487206
	1.14714	1.02908	0.68045		0.952713	0.934837	0.323431
NFAT5 Dehydration-Rehydration Muscle(Fig.4)				BGT-1 Dehydration-Rehydration Muscle (Fig.4)
	Control	Anoxia	Recovery		Control	Anoxia	Recovery
	0.947671	1.16742	1.13479		0.765957	1.14003	1.85632
	0.978999	1.84604	1.27299		1.3299	0.933174	1.40198
	1.07333	1.28445	1.13212		0.850129	0.977256	1.53191
		1.36309	1.1204		1.05401	1.23905	1.12108
SMIT Dehydration-Rehydration Muscle (Fig.4)				Aldose Reductase Dehydration-Rehydration Muscle (Fig.4)
	Control	Anoxia	Recovery		Control	Anoxia	Recovery
	0.698464	1.37403	1.86257		0.95794	0.61651	0.492557
	1.14832	2.15102	1.43448		1.12889	0.590488	0.476412
	0.764132	1.87008	1.70736		0.91993	0.570794	0.581456
	1.38908		1.74616		0.993237	0.548226	0.404328
NFAT5 Dehydration-Rehydration Liver (Fig.5)				BGT-1 Dehydration-Rehydration Liver (Fig.5)
	Control	Anoxia	Recovery		Control	Anoxia	Recovery
	0.765561	0.47701	1.08465		0.963904	1.64371	2.69893
	1.28497	0.49055	1.19662		0.700194	1.818	2.10682
	0.965222	0.398974	0.940115		1.213	2.95865	2.55988
	0.984248	0.520606	0.790342		1.1229	3.22698	2.11267
SMIT Dehydration-Rehydration Liver (Fig.5)				Aldose Reductase Dehydration-Rehydration Liver (Fig.5)
	Control	Anoxia	Recovery		Control	Anoxia	Recovery
	1.01436	1.90734	1.2765		0.80408	0.693932	0.917331
	0.790603	1.98854	1.46978		1.15937	0.868407	2.71143
	0.92352	1.76973	1.19398		1.06139	0.745814	1.37248
	1.27152	1.59243	1.18195		0.975161	0.295169	1.99412
NFAT5 Dehydration-Rehydration Kidney (Fig.6)				BGT-1 Dehydration-Rehydration Kidney (Fig.6)
	Control	Anoxia	Recovery		Control	Anoxia	Recovery
	1.07063	1.24476	0.891592		1.23435	0.668546	1.21357
	1.00106	1.43592	0.850777		1.02406	0.693634	1.27354
	1.04616	1.0533	0.760644		0.914335	0.940091	1.38353
	0.882143	1.14567	0.941387		0.827256	0.78822	0.881681
SMIT Dehydration-Rehydration Kidney (Fig.6)				Aldose Reductase Dehydration-Rehydration Kidney (Fig.6)
	Control	Anoxia	Recovery		Control	Anoxia	Recovery
	0.94022	0.774688	0.834066		1.04904	1.17326	1.03426
	1.09692	0.654393	0.972092		1.0092	1.80303	1.00135
	0.957794	0.676186	1.08665		1.25126	1.68482	1.3113
	1.00506	0.672475	1.39292		0.690505	1.78018	0.726256
								Legend
								Mean band densitometries (± S.E.M., n=4 independent protein isolations from different animals) were calculated from representative bands that were standardized to the Coomassie total protein loading control lanes for each blot. The Data was then normalized to the mean of the control values, and these normalized values are shown above for each of the 4 targets at each of the 3 condtions in each of…
